# Supplementary material for: Preparation of sulfonated ordered mesoporous carbon catalyst and its catalytic performance for esterification of free fatty acids in waste cooking oils
Source: Royal Society of Chemistry journal article supplement (doi:10.1039/c9ra02546d), 2019-01-01

## Supporting Information

**Table S1** Catalytic evaluation of different catalysts for esterification of FFAs and alcohols

|               | Catalysts                       | Acid | Alcohol        | T(°C) | t(h) | FFAs Conv.(%) |
|---------------|---------------------------------|------|----------------|-------|------|---------------|
| Homogeneous   | H <sub>2</sub> SO <sub>4</sub>  | FFAs | 2-ethylhexanol | 130   | 2    | 94.0          |
|               | Pb stearate                     | FFAs | Methanol       | 210   | 3.3  | 90.0          |
|               | Relite CFS                      | FFAs | Methanol       | 100   | 2    | 74.0          |
| Heterogeneous | Bagasse carbon-based solid acid | FFAs | Methanol       | 66    | 4    | 91.4          |
|               | SO <sub>3</sub> H-APC-6-160     | FFAs | Methanol       | 70    | 6    | 89.7          |
|               | OMC-SO <sub>3</sub> H           | FFAs | Ethanol        | 80    | 10   | 73.6          |
|               | SO <sub>3</sub> H-OMC(s)-6-160  | FFAs | Methanol       | 70    | 6    | 93.8          |

**Fig. S1** The relationship between FFAs conversion and density of -SO<sub>3</sub>H groups

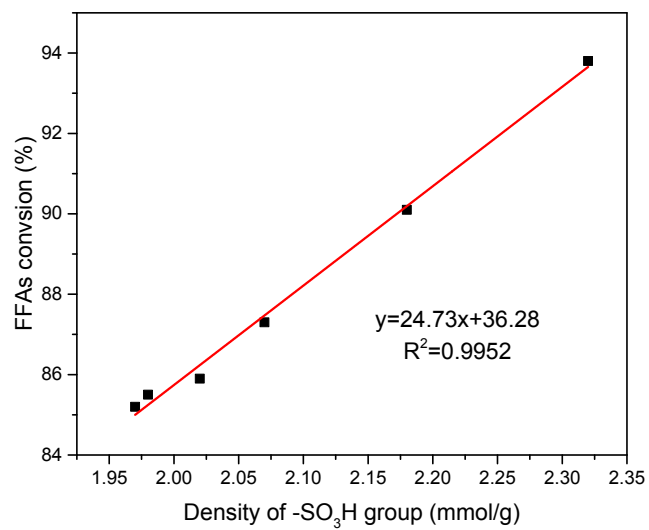

Supplement: c9ra02546d1.pdf [file c9ra02546d1.pdf]
